**Table S1. Description of BCAC studies included in the analysis of gene-environment interaction**

| Study Acronym | Study Name [Reference]                        | Country   | Recruitment base                                                                                                                                                                                                                                                                                                                                                                                                                                               |                                                                                                                                                                                                                                                                                                                                                            | Sample size |          |
|---------------|-----------------------------------------------|-----------|----------------------------------------------------------------------------------------------------------------------------------------------------------------------------------------------------------------------------------------------------------------------------------------------------------------------------------------------------------------------------------------------------------------------------------------------------------------|------------------------------------------------------------------------------------------------------------------------------------------------------------------------------------------------------------------------------------------------------------------------------------------------------------------------------------------------------------|-------------|----------|
|               |                                               |           | Cases                                                                                                                                                                                                                                                                                                                                                                                                                                                          | Controls                                                                                                                                                                                                                                                                                                                                                   | Cases       | Controls |
| ABCFS         | Australian Breast Cancer Family Study [1]     | Australia | Cancer registries in Victoria and New South Wales (1992-1999): all cases from Melbourne and Sydney diagnosed before age 40 plus a random sample of those diagnosed at ages 40-59.                                                                                                                                                                                                                                                                              | Identified between 1992-1999 from the electoral rolls in Melbourne and Sydney (enrolling to vote is compulsory); frequency matched to cases by age in-5 year categories.                                                                                                                                                                                   | 1335        | 687      |
| BBCC          | Bavarian Breast Cancer Cases and Controls [2] | Germany   | Consecutive, unselected cases with invasive breast cancer recruited at the University Breast Centre, Franconia in Northern Bavaria from 2002-2006.                                                                                                                                                                                                                                                                                                             | Healthy women aged 55 or older with no diagnosis of cancer. Invited by a newspaper advertisement in Northern Bavaria between 2002-2006.                                                                                                                                                                                                                    | 1432        | 1002     |
| BBCS          | British Breast Cancer Study [3]               | U.K.      | (i) English & Scottish Cancer Registries: all breast cancer cases who developed a first primary before age 66 in 1971 or later and who subsequently developed a second primary cancer.<br>(ii) Breast Cancer Clinics: all breast cancer cases who developed a first primary before age 71 in 1967 or later and who either subsequently developed a second primary or had at least two affected female first-degree relatives.<br>All recruited from 2001-2008. | A friend, sister-in-law, daughter-in-law or other non-blood relative of cases, recruited from 2001-2008.                                                                                                                                                                                                                                                   | 1381        | 1297     |
| CECILE        | CECILE Breast cancer study [4]                | France    | All cases diagnosed with breast cancer in 2005-2007 among women <75 years of age residing in the <i>départements</i> of Ille-et-Vilaine and Côte d'Or . Cases were recruited from the main cancer treatment center (Centre Eugène-Marquis in Rennes and Centre Georges-François-Leclerc in Dijon) and from other private or public hospitals in each area.                                                                                                     | General population control women residing in the same areas as the cases (Ille-et-Vilaine and Côte d'Or). Controls were frequency-matched to the cases by 5-year age groups. They were recruited in 2005-2007 using a random digit dialing procedure and quotas by socioeconomic status to reflect the distribution by SES of the population in each area. | 938         | 1026     |

| Study Acronym | Study Name [Reference]                                        | Country | Recruitment base                                                                                                                                                                                                                                                                                                                                            |                                                                                                                                                                                                                                                                                                                                            | Sample size |          |
|---------------|---------------------------------------------------------------|---------|-------------------------------------------------------------------------------------------------------------------------------------------------------------------------------------------------------------------------------------------------------------------------------------------------------------------------------------------------------------|--------------------------------------------------------------------------------------------------------------------------------------------------------------------------------------------------------------------------------------------------------------------------------------------------------------------------------------------|-------------|----------|
|               |                                                               |         | Cases                                                                                                                                                                                                                                                                                                                                                       | Controls                                                                                                                                                                                                                                                                                                                                   | Cases       | Controls |
| CGPS          | Copenhagen General Population Study [5]                       | Denmark | Consecutive, incident cases from one hospital with centralized care for a population of 400,000 women in Copenhagen (2001-present).                                                                                                                                                                                                                         | Women with no history of breast cancer residing in the same region as cases identified from the Copenhagen General Population Study (2003-2007).                                                                                                                                                                                           | 2388        | 6704     |
| CTS           | California Teachers Study [6]                                 | USA     | Nested case-control study conducted within a cohort of California teachers (113,590) who were under age 80 years at baseline, had no prior history of invasive or <i>in situ</i> breast cancer. Cases are women newly diagnosed with a histologically confirmed invasive primary adenocarcinoma of the breast at age 80 years or younger from 1998 to 2008. | Controls are a probability sample of at-risk cohort members, frequency matched to cases on age at baseline (5-year age groups), self-reported race/ethnicity (white, African American, Latina, Asian, other), and broad geographic region within California. Controls were selected without replacement, using an assigned reference date. | 1252        | 1226     |
| ESTHER        | ESTHER Breast Cancer Study [7]                                | Germany | Breast cancer cases in all hospitals in the state of Saarland, from 2001-2003 (ESTHER) and 1996-1998 (VERDI).                                                                                                                                                                                                                                               | Random sample of women a routine health check-up in Saarland, in 2000-2002; frequency matched to cases by age in 5-year categories.                                                                                                                                                                                                        | 433         | 511      |
| GENICA        | Gene Environment Interaction & Breast Cancer in Germany [8,9] | Germany | Incident breast cancer cases enrolled at hospitals in the Greater Bonn area between 2000-2004.                                                                                                                                                                                                                                                              | Random address sample selected in 2001-2004 from 31 population registries in the greater Bonn area; frequency matched to cases on year of birth in 5-year categories.                                                                                                                                                                      | 1021        | 1015     |
| GESBC         | Genetic Epidemiologic Study of Breast Cancer by Age 50[10]    | Germany | All incident cases diagnosed <50 years of age in 1992-5 in two regions: Rhein-Neckar-Odenwald and Freiburg, by surveying the 38 clinics serving these regions                                                                                                                                                                                               | Selected from random lists of residents of the study regions supplied by population registries; two controls were selected for each case, matched by age and study region. Recruitment was carried out 1992-1998.                                                                                                                          | 586         | 869      |

| Study Acronym | Study Name [Reference]                           | Country   | Recruitment base                                                                                                                                                                               |                                                                                                                                                                                 | Sample size |          |
|---------------|--------------------------------------------------|-----------|------------------------------------------------------------------------------------------------------------------------------------------------------------------------------------------------|---------------------------------------------------------------------------------------------------------------------------------------------------------------------------------|-------------|----------|
|               |                                                  |           | Cases                                                                                                                                                                                          | Controls                                                                                                                                                                        | Cases       | Controls |
| KBCP          | Kuopio Breast Cancer Project [11]                | Finland   | Women seen at Kuopio University Hospital between 1990-1995 because of a breast lump, mammographic abnormality, or other breast symptom and who were found to have breast cancer.               | Selected from the National Population Register between 1990-1995; age and long-term area-of-residence matched to cases.                                                         | 466         | 523      |
| LMBC          | Leuven Multidisciplinary Breast Centre [12]      | Belgium   | All patients diagnosed with breast cancer and seen in the Multidisciplinary Breast Center in Leuven (Gashuisberg) since June 2007 plus retrospective collection of cases diagnosed since 2000. | Blood donors at Gasthuisberg Hospital (200-2008).                                                                                                                               | 2890        | 1625     |
| MARIE         | Mammary Carcinoma Risk Factor Investigation [13] | Germany   | Incident cases diagnosed from 2001-2005 in the study region Hamburg in Northern Germany, and from 2002-2005 in the study region Rhein-Neckar-Karlsruhe in Southern Germany.                    | 2 controls per case were randomly drawn from population registries and frequency matched by birth year and study region to the case. Controls were recruited from 2002 to 2006. | 2583        | 5309     |
| MCBCS         | Mayo Clinic Breast Cancer Study [14]             | USA       | Incident cases residing in 6 states (MN, WI, IA, IL, ND, SD) seen at the Mayo Clinic in Rochester, MN from 2002-2010.                                                                          | Women presenting for general medical examination at the Mayo Clinic from 2002-2010; frequency matched to cases on age, ethnicity and county/state.                              | 1803        | 2452     |
| MCCS          | Melbourne Collaborative Cohort Study [15]        | Australia | Incident cases from the cohort of 24,469 women, diagnosed during the follow-up from baseline (1990-1994) to 2008.                                                                              | Random sample of the initial cohort.                                                                                                                                            | 703         | 766      |
| MSKCC         | Memorial Sloan-Kettering Cancer Center Study[16] | USA       | Incident and prevalent cases of histologically-confirmed breast cancer referred to the Clinical Genetics Service at MSKCC since July 1996. All cases tested negative for BRCA1/2 mutations.    | Women who have not been diagnosed with breast cancer, but who were referred to the Clinical Genetics Service at MSKCC. All controls tested negative for BRCA1/2 mutations.      | 425         | 455      |

| Study Acronym | Study Name [Reference]                                       | Country | Recruitment base                                                                                                                                                                                                                                                                                                                                                                                                                                                                     |                                                                                                                                                                                                            | Sample size |          |
|---------------|--------------------------------------------------------------|---------|--------------------------------------------------------------------------------------------------------------------------------------------------------------------------------------------------------------------------------------------------------------------------------------------------------------------------------------------------------------------------------------------------------------------------------------------------------------------------------------|------------------------------------------------------------------------------------------------------------------------------------------------------------------------------------------------------------|-------------|----------|
|               |                                                              |         | Cases                                                                                                                                                                                                                                                                                                                                                                                                                                                                                | Controls                                                                                                                                                                                                   | Cases       | Controls |
| NC-BCFR       | Northern California Breast Cancer Family Registry [17]       | USA     | Incident cases aged <65 years diagnosed from 1995-2003 were identified through the SEER cancer registry of the Greater San Francisco Bay Area. All cases at increased genetic risk were eligible (dx at age <35 yrs, personal history of ovarian or childhood cancer, bilateral breast cancer with 1st dx at age <50, family history of breast or ovarian cancer in first-degree relatives). Cases not meeting these criteria were randomly sampled (2.5% of whites, 32% of others). | Identified through random digit dialing, frequency matched to cases on 5-year age group and race/ethnicity, at a ratio of 1 control per 2 cases.                                                           | 268         | 154      |
| OFBCR         | Ontario Familial Breast Cancer Registry [17]                 | Canada  | Invasive cases aged 20-54 years identified from the Ontario Cancer Registry from 1996-1998. All those at high genetic risk were eligible; random samples of women not meeting these criteria were also asked to participate.                                                                                                                                                                                                                                                         | Identified by calling randomly selected residential telephone numbers in the same geographical region from 1998-2001; frequency matched to cases by age in 5 year categories.                              | 1135        | 328      |
| PBCS          | NCI Polish Breast Cancer Study [18]                          | Poland  | Incident cases identified through a rapid identification system in participating hospitals covering ~ 90% of all eligible cases, and cancer registries in Warsaw and Łódź covering 100% of all eligible cases (2000-2003).                                                                                                                                                                                                                                                           | Randomly selected from population lists of all residents of Poland from 2000-2003, stratified and frequency matched to cases on city and age in 5-year categories.                                         | 2009        | 2381     |
| SASBAC        | Singapore and Sweden Breast Cancer Study [19]                | Sweden  | Women diagnosed in Sweden aged 50-74 in 1993-1995.                                                                                                                                                                                                                                                                                                                                                                                                                                   | Population-based controls frequency matched by age to the cases.                                                                                                                                           | 1246        | 1515     |
| SBCS          | Sheffield Breast Cancer Study [20]                           | U.K.    | Women with breast cancer recruited in 1998-2005 at surgical outpatient clinics at the Royal Hallamshire Hospital, Sheffield.                                                                                                                                                                                                                                                                                                                                                         | Unselected women attending the Sheffield Mammography Screening Service in 2000-2004 with no evidence of a breast lesion.                                                                                   | 1111        | 1283     |
| SEARCH        | Study of Epidemiology & Risk Factors in Cancer Heredity [21] | U.K.    | Identified through the East Anglian Cancer Registry: (i) 1991-1996: alive, prevalent cases diagnosed before age 55; (ii) since 1996: incident cases diagnosed before age 70 diagnosed after 1996.                                                                                                                                                                                                                                                                                    | (a) Women from the same geographic region selected from the EPIC-Norfolk cohort study, 1992-1994 (b) women attending GP practices, frequency matched to cases by age and geographic region (2003-present). | 6720        | 6682     |

| Study Acronym | Study Name [Reference]                                                                                                   | Country   | Recruitment base                                                                                                                                                                                                                                                                                                              |                                                                                                                                                                                                                                                       | Sample size |          |
|---------------|--------------------------------------------------------------------------------------------------------------------------|-----------|-------------------------------------------------------------------------------------------------------------------------------------------------------------------------------------------------------------------------------------------------------------------------------------------------------------------------------|-------------------------------------------------------------------------------------------------------------------------------------------------------------------------------------------------------------------------------------------------------|-------------|----------|
|               |                                                                                                                          |           | Cases                                                                                                                                                                                                                                                                                                                         | Controls                                                                                                                                                                                                                                              | Cases       | Controls |
| US3SS         | US Three State Study [22]                                                                                                | USA       | Eligible cases were all English-speaking female residents of Massachusetts (excluding metropolitan Boston), New Hampshire and Wisconsin, with a new diagnosis of invasive (aged 20–69 years) or in situ breast cancer (aged 20–74 years, MA and NH only) reported to each state's mandatory cancer registry during 1998-2001. | Controls were randomly selected from driver's license lists for women aged 20–64 years and from Medicare beneficiary lists for women aged 65–74 years in each state, and frequency-matched to cases by age in 5-year categories. Recruited 1998-2001. | 1444        | 1274     |
| USRTS         | US Radiologic Technologists Study[23–26]                                                                                 | USA       | Prevalent cases identified through mailed surveys in 1983-8 and 1994-8, incident cases between surveys; blood collected from 1999-2004; unselected for family cancer history or any other characteristics; most cases sampled more than 5 years after diagnosis                                                               | Selected from women within the cohort without breast cancer as of 1999, blood collected between 2000-2004; matched to cases on year of birth in 5-year strata                                                                                         | 725         | 1053     |
| kConFab/AOCS  | Kathleen Cuningham Foundation Consortium for Research into Familial Breast Cancer / Australian Ovarian Cancer Study [27] | Australia | Index (youngest affected) cases from <i>BRCA1</i> - and <i>BRCA2</i> -mutation-negative multiple-case breast and breast-ovarian families recruited through family cancer clinics from across Australia and New Zealand from 1998-present.                                                                                     | Identified from the electoral rolls from across Australia as part of the Australian Ovarian Cancer Study in 2002-2006.                                                                                                                                | 499         | 962      |

#### Reference List

1. Dite GS, Jenkins MA, Southey MC, Hocking JS, Giles GG et al. (2003) Familial risks, early-onset breast cancer, and BRCA1 and BRCA2 germline mutations. *J Natl Cancer Inst* 19;95: 448-457.
2. Schrauder M, Frank S, Strissel PL, Lux MP, Bani MR et al. (2008) Single nucleotide polymorphism D1853N of the ATM gene may alter the risk for breast cancer. *J Cancer Res Clin Oncol* 134: 873-882.
3. Fletcher O, Johnson N, Palles C, dos SS, I, McCormack V et al. (2006) Inconsistent association between the STK15 F31I genetic polymorphism and breast cancer risk. *J Natl Cancer Inst* 98: 1014-1018.

4. Menegaux F, Truong T, Anger A, Cordina-Duverger E, Lamkarkach F et al. (2012) Night work and breast cancer: A population-based case-control study in France (the CECILE study). *Int J Cancer* .
5. Weischer M, Bojesen SE, Tybjaerg-Hansen A, Axelsson CK, Nordestgaard BG (2007) Increased risk of breast cancer associated with CHEK2\*1100delC. *J Clin Oncol* 25: 57-63.
6. Seal S, Thompson D, Renwick A, Elliott A, Kelly P et al. (2006) Truncating mutations in the Fanconi anemia J gene BRIP1 are low-penetrance breast cancer susceptibility alleles. *Nat Genet* 38: 1239-1241.
7. Widschwendter M, Apostolidou S, Raum E, Rothenbacher D, Fiegl H et al. (2008) Epigenotyping in peripheral blood cell DNA and breast cancer risk: a proof of principle study. *PLoS One* 3: e2656.
8. Justenhoven C, Pierl CB, Haas S, Fischer HP, Baisch C et al. (2008) The CYP1B1\_1358\_GG genotype is associated with estrogen receptor-negative breast cancer. *Breast Cancer Res Treat* 111: 171-177.
9. Pesch B, Ko Y, Brauch H, Hamann U, Harth V et al. (2005) Factors modifying the association between hormone-replacement therapy and breast cancer risk. *Eur J Epidemiol* 20: 699-711.
10. Chang-Claude J, Eby N, Kiechle M, Bastert G, Becher H (2000) Breastfeeding and breast cancer risk by age 50 among women in Germany. *Cancer Causes Control* 11: 687-695.
11. Hartikainen JM, Tuhkanen H, Kataja V, Dunning AM, Antoniou A et al. (2005) An autosome-wide scan for linkage disequilibrium-based association in sporadic breast cancer cases in eastern Finland: three candidate regions found. *Cancer Epidemiol Biomarkers Prev* 14: 75-80.
12. De ML, Van LE, De NK, Moerman P, Pochet N et al. (2008) Does estrogen receptor negative/progesterone receptor positive breast carcinoma exist? *J Clin Oncol* 26: 335-336.
13. Flesch-Janys D, Slinger T, Mutschelknauss E, Kropp S, Obi N et al. (2008) Risk of different histological types of postmenopausal breast cancer by type and regimen of menopausal hormone therapy. *Int J Cancer* 123: 933-941.
14. Olson JE, Ma CX, Pelleymounter LL, Schaid DJ, Pankratz VS et al. (2007) A comprehensive examination of CYP19 variation and breast density. *Cancer Epidemiol Biomarkers Prev* 16: 623-625.
15. Giles GG, English DR (2002) The Melbourne Collaborative Cohort Study. *IARC Sci Publ* 156: 69-70.

16. Comen E, Balistreri L, Gonen M, Dutra-Clarke A, Fazio M et al. (2011) Discriminatory accuracy and potential clinical utility of genomic profiling for breast cancer risk in BRCA-negative women. *Breast Cancer Res Treat* 127: 479-487.
17. John EM, Hopper JL, Beck JC, Knight JA, Neuhausen SL et al. (2004) The Breast Cancer Family Registry: an infrastructure for cooperative multinational, interdisciplinary and translational studies of the genetic epidemiology of breast cancer. *Breast Cancer Res* 6: R375-R389.
18. Garcia-Closas M, Brinton LA, Lissowska J, Chatterjee N, Peplonska B et al. (2006) Established breast cancer risk factors by clinically important tumour characteristics. *Br J Cancer* 95: 123-129.
19. Wedren S, Lovmar L, Humphreys K, Magnusson C, Melhus H et al. (2004) Oestrogen receptor alpha gene haplotype and postmenopausal breast cancer risk: a case control study. *Breast Cancer Res* 6: R437-R449.
20. MacPherson G, Healey CS, Teare MD, Balasubramanian SP, Reed MW et al. (2004) Association of a common variant of the CASP8 gene with reduced risk of breast cancer. *J Natl Cancer Inst* 96: 1866-1869.
21. Lesueur F, Pharoah PD, Laing S, Ahmed S, Jordan C et al. (2005) Allelic association of the human homologue of the mouse modifier Ptpj with breast cancer. *Hum Mol Genet* 14: 2349-2356.
22. Garcia-Closas M, Egan KM, Newcomb PA, Brinton LA, Titus-Ernstoff L et al. (2006) Polymorphisms in DNA double-strand break repair genes and risk of breast cancer: two population-based studies in USA and Poland, and meta-analyses. *Hum Genet* 119: 376-388.
23. Sigurdson AJ, Doody MM, Rao RS, Freedman DM, Alexander BH et al. (2003) Cancer incidence in the US radiologic technologists health study, 1983-1998. *Cancer* 97: 3080-3089.
24. Bhatti P, Doody MM, Alexander BH, Yuenger J, Simon SL et al. (2008) Breast cancer risk polymorphisms and interaction with ionizing radiation among U.S. radiologic technologists. *Cancer Epidemiol Biomarkers Prev* 17: 2007-2011.
25. Rajaraman P, Bhatti P, Doody MM, Simon SL, Weinstock RM et al. (2008) Nucleotide excision repair polymorphisms may modify ionizing radiation-related breast cancer risk in US radiologic technologists. *Int J Cancer* 123: 2713-2716.
26. Sigurdson AJ, Bhatti P, Chang SC, Rajaraman P, Doody MM et al. (2009) Polymorphisms in estrogen biosynthesis and metabolism-related genes, ionizing radiation exposure, and risk of breast cancer among US radiologic technologists. *Breast Cancer Res Treat* 118: 177-184.

27. Beesley J, Jordan SJ, Spurdle AB, Song H, Ramus SJ et al. (2007) Association between single-nucleotide polymorphisms in hormone metabolism and DNA repair genes and epithelial ovarian cancer: results from two Australian studies and an additional validation set. *Cancer Epidemiol Biomarkers Prev* 16: 2557-2565.
