# Supplementary material for: Evidence of Gene–Environment Interactions between Common Breast Cancer Susceptibility Loci and Established Environmental Risk Factors
Source: PLoS Genet. 2013 Mar 27;9(3):e1003284. doi: 10.1371/journal.pgen.1003284 (PMC3609648; doi:10.1371/journal.pgen.1003284)
Supplement: Table S2 — Description of environmental risk factors by study. (PDF) [file pgen.1003284.s002.pdf]

**Table S2. Description of environmental risk factors by study**

| Variable                                        | Population-based studies |          |         |          |       |          |         |          |         |          |         |          |         |          |         |          |
|-------------------------------------------------|--------------------------|----------|---------|----------|-------|----------|---------|----------|---------|----------|---------|----------|---------|----------|---------|----------|
|                                                 | ABCFS                    |          | CECILE  |          | CGPS  |          | CTS     |          | ESTHER  |          | GENICA  |          | GESBC   |          | KBCP    |          |
|                                                 | cases                    | controls | cases   | controls | cases | controls | cases   | controls | cases   | controls | cases   | controls | cases   | controls | cases   | controls |
| Total number                                    | 1335                     | 687      | 938     | 1026     | 2388  | 6704     | 1252    | 1226     | 428     | 511      | 1021    | 1015     | 586     | 869      | 466     | 523      |
| Reference age:                                  |                          |          |         |          |       |          |         |          |         |          |         |          |         |          |         |          |
| mean                                            | 42.4                     | 41.6     | 54.4    | 54.7     | 62.0  | 55.7     | 61.8    | 56.2     | 60.3    | 62.3     | 58.2    | 58.2     | 42.6    | 42.7     | 59.0    | 52.9     |
| range                                           | 23-69                    | 20-68    | 25-74   | 25-74    | 27-95 | 20-91    | 32-83   | 26-77    | 30-79   | 49-75    | 23-80   | 24-80    | 20-50   | 24-52    | 23-92   | 17-77    |
| Age at Menarche:                                |                          |          |         |          |       |          |         |          |         |          |         |          |         |          |         |          |
| mean                                            | 12.8                     | 12.9     | 12.9    | 13.1     | 13.6  | 13.5     | 12.5    | 12.5     | 13.5    | 13.7     | 13.4    | 13.6     | 13.1    | 13.1     | 13.8    | 13.6     |
| range                                           | 8-18                     | 9-21     | 9-18    | 9-21     | 8-22  | 8-20     | 10-17   | 10-17    | 9-18    | 9-19     | 8-21    | 8-20     | 9-19    | 9-20     | 10-19   | 10-18    |
| unknown                                         | 6                        | 1        | 11      | 10       | 52    | 117      | 16      | 15       | 5       | 9        | 1       | 3        | 3       | 1        | 42      | 50       |
| Parous                                          |                          |          |         |          |       |          |         |          |         |          |         |          |         |          |         |          |
| no                                              | 296                      | 166      | 104     | 70       | 271   | 761      | 269     | 233      | 49      | 43       | 182     | 177      | 127     | 182      | 99      | 78       |
| yes                                             | 1039                     | 521      | 834     | 956      | 1900  | 5899     | 968     | 976      | 378     | 461      | 839     | 837      | 459     | 687      | 341     | 419      |
| unknown                                         | 0                        | 0        | 0       | 0        | 217   | 44       | 15      | 17       | 1       | 7        | 0       | 1        | 0       | 0        | 26      | 26       |
| Numbers of births:                              |                          |          |         |          |       |          |         |          |         |          |         |          |         |          |         |          |
| mean                                            | 2.3                      | 2.4      | 2.7     | 3.0      | 2.1   | 2.1      | 2.4     | 2.5      | 2.3     | 2.3      | 2.1     | 2.1      | 1.8     | 1.9      | 2.6     | 2.6      |
| range                                           | 1-9                      | 1-6      | 1-15    | 1-12     | 1-6   | 1-8      | 1-9     | 1-9      | 1-11    | 1-12     | 1-11    | 1-12     | 1-6     | 1-8      | 1-9     | 1-12     |
| unknown                                         | 0                        | 0        | 0       | 0        | 274   | 51       | 15      | 17       | 11      | 34       | 0       | 1        | 0       | 0        | 26      | 26       |
| Age at first birth:                             |                          |          |         |          |       |          |         |          |         |          |         |          |         |          |         |          |
| mean                                            | 25.6                     | 25.8     | 24.8    | 24.1     | 24.8  | 24.9     | 26.1    | 25.8     |         |          | 25.7    | 25.5     | 24.3    | 24.3     | 24.8    | 24.5     |
| range                                           | 14-40                    | 14-42    | 15-42   | 14-42    | 15-42 | 15-43    | 14-41   | 16-42    |         |          | 15-41   | 16-45    | 15-39   | 14-41    | 17-47   | 16-42    |
| unknown                                         | 0                        | 0        | 0       | 1        | 263   | 61       | 15      | 17       |         |          | 1       | 2        | 0       | 0        | 28      | 26       |
| Ever breastfed:                                 |                          |          |         |          |       |          |         |          |         |          |         |          |         |          |         |          |
| no                                              | 148                      | 60       | 275     | 291      |       |          |         |          |         |          | 287     | 274      | 149     | 207      | 16      | 16       |
| yes                                             | 891                      | 461      | 417     | 512      |       |          |         |          |         |          | 547     | 560      | 310     | 480      | 325     | 403      |
| unknown                                         | 0                        | 0        | 142     | 153      |       |          |         |          |         |          | 5       | 4        | 0       | 0        | 26      | 26       |
| Usual adult BMI,                                |                          |          |         |          |       |          |         |          |         |          |         |          |         |          |         |          |
| age <54:                                        |                          |          |         |          |       |          |         |          |         |          |         |          |         |          |         |          |
| mean                                            | 24.3                     | 24.5     | 23.0    | 24.4     |       |          |         |          |         |          | 24.7    | 24.8     | 24.2    | 24.2     | 26.0    | 26.1     |
| range                                           | 15-44                    | 17-44    | 15-38   | 15-55    |       |          |         |          |         |          | 17-47   | 17-52    | 14-44   | 17-48    | 17-44   | 17-48    |
| unknown                                         | 0                        | 0        | 9       | 9        |       |          |         |          |         |          | 0       | 0        | 1       | 0        | 20      | 36       |
| Usual adult BMI,                                |                          |          |         |          |       |          |         |          |         |          |         |          |         |          |         |          |
| age >=54:                                       |                          |          |         |          |       |          |         |          |         |          |         |          |         |          |         |          |
| mean                                            | 25.9                     | 26.5     | 25.9    | 25.5     |       |          |         |          |         |          | 25.6    | 25.7     |         |          | 27.2    | 26.8     |
| range                                           | 18-44                    | 19-41    | 15-48   | 15-52    |       |          |         |          |         |          | 17-53   | 17-43    |         |          | 15-52   | 17-46    |
| unknown                                         | 1                        | 0        | 28      | 48       |       |          |         |          |         |          | 0       | 1        |         |          | 32      | 26       |
| Adult height:                                   |                          |          |         |          |       |          |         |          |         |          |         |          |         |          |         |          |
| mean (cm):                                      | 164                      | 163      | 162     | 161      |       |          | 165     | 165      | 163     | 162      | 166     | 165      | 165     | 165      | 162     | 161      |
| range                                           | 145-185                  | 145-183  | 134-180 | 140-180  |       |          | 145-193 | 145-186  | 140-184 | 143-180  | 147-184 | 144-183  | 140-184 | 142-182  | 144-177 | 143-176  |
| unknown                                         | 1                        | 0        | 36      | 55       |       |          | 30      | 42       | 3       | 6        | 0       | 1        | 0       | 0        | 31      | 50       |
| Oral contraceptives:                            |                          |          |         |          |       |          |         |          |         |          |         |          |         |          |         |          |
| never                                           | 220                      | 104      | 310     | 316      |       |          |         |          | 179     | 233      | 399     | 387      | 73      | 118      | 283     | 240      |
| ever                                            | 1115                     | 583      | 628     | 709      |       |          |         |          | 245     | 266      | 622     | 627      | 403     | 564      | 130     | 198      |
| Unknown                                         | 0                        | 0        | 0       | 1        |       |          |         |          | 4       | 12       | 0       | 1        | 110     | 187      | 53      | 85       |
| Duration of OC use:                             |                          |          |         |          |       |          |         |          |         |          |         |          |         |          |         |          |
| mean (years):                                   | 8.3                      | 7.7      | 11.3    | 10.7     |       |          |         |          | 11.6    | 11.2     | 11.2    | 10.9     | 11.4    | 11.5     | 5.1     | 4.5      |
| range                                           | 1-28                     | 1-26     | 1-35    | 1-35     |       |          |         |          | 1-35    | 1-40     | 1-35    | 1-33     | 1-28    | 1-31     | 1-18    | 1-21     |
| unknown                                         | 3                        | 3        | 14      | 17       |       |          |         |          | 13      | 24       | 4       | 4        | 120     | 194      | 53      | 85       |
| Current use of<br>estrogen/<br>progestagen MHT: |                          |          |         |          |       |          |         |          |         |          |         |          |         |          |         |          |
| no                                              |                          |          | 406     | 469      |       |          |         |          |         |          | 582     | 612      |         |          |         |          |

**Population-based studies**

| Variable                                                         | ABCFS |          | CECILE |          | CGPS  |          | CTS   |          | ESTHER |          | GENICA |          | GESBC |          | KBCP  |          |
|------------------------------------------------------------------|-------|----------|--------|----------|-------|----------|-------|----------|--------|----------|--------|----------|-------|----------|-------|----------|
|                                                                  | cases | controls | cases  | controls | cases | controls | cases | controls | cases  | controls | cases  | controls | cases | controls | cases | controls |
| yes                                                              |       |          | 58     | 48       |       |          |       |          |        |          | 92     | 63       |       |          |       |          |
| unknown                                                          |       |          | 42     | 52       |       |          |       |          |        |          | 0      | 1        |       |          |       |          |
| Current use of<br>estrogen only MHT:                             |       |          |        |          |       |          |       |          |        |          |        |          |       |          |       |          |
| no                                                               |       |          | 444    | 497      |       |          |       |          |        |          | 606    | 584      |       |          | 243   | 203      |
| yes                                                              |       |          | 22     | 21       |       |          |       |          |        |          | 67     | 91       |       |          | 1     | 1        |
| unknown                                                          |       |          | 40     | 51       |       |          |       |          |        |          | 1      | 1        |       |          | 24    | 31       |
| Duration of<br>estrogen/<br>progestagen MHT<br>in current users: |       |          |        |          |       |          |       |          |        |          |        |          |       |          |       |          |
| mean (years):                                                    |       |          | 7.7    | 3.5      |       |          |       |          |        |          | 9.7    | 8.8      |       |          |       |          |
| range                                                            |       |          | 4-13   | 1-6      |       |          |       |          |        |          | 1-33   | 1-24     |       |          |       |          |
| unknown                                                          |       |          | 114    | 128      |       |          |       |          |        |          | 7      | 7        |       |          |       |          |
| Duration of<br>estrogen only MHT<br>in current users:            |       |          |        |          |       |          |       |          |        |          |        |          |       |          |       |          |
| mean (years):                                                    |       |          | 4.3    | 4.0      |       |          |       |          |        |          | 13.4   | 9.6      |       |          | 14.0  | 18.0     |
| range                                                            |       |          | 1-11   | 1-10     |       |          |       |          |        |          | 1-34   | 1-23     |       |          | 14-14 | 18-18    |
| unknown                                                          |       |          | 72     | 100      |       |          |       |          |        |          | 6      | 11       |       |          | 32    | 43       |
| Mean lifetime<br>intake of alcohol <sup>1</sup> :                |       |          |        |          |       |          |       |          |        |          |        |          |       |          |       |          |
| mean (g/day):                                                    |       |          | 6.6    | 7.0      |       |          |       |          |        |          |        |          | 10.9  | 8.2      |       |          |
| range                                                            |       |          | 0-117  | 0-90     |       |          |       |          |        |          |        |          | 0-128 | 0-89     |       |          |
| unknown                                                          |       |          | 0      | 0        |       |          |       |          |        |          |        |          | 0     | 0        |       |          |
| Smoking:                                                         |       |          |        |          |       |          |       |          |        |          |        |          |       |          |       |          |
| never                                                            | 627   | 339      | 569    | 613      |       |          |       |          | 263    | 335      | 586    | 555      | 273   | 401      | 361   | 394      |
| ever                                                             | 707   | 348      | 369    | 413      |       |          |       |          | 162    | 164      | 434    | 460      | 312   | 468      | 105   | 129      |
| unknown                                                          | 1     | 0        | 0      | 0        |       |          |       |          | 3      | 12       | 1      | 0        | 1     | 0        | 0     | 0        |
| Pack-years of<br>smoking:                                        |       |          |        |          |       |          |       |          |        |          |        |          |       |          |       |          |
| mean                                                             | 14.0  | 12.2     | 12.9   | 12.3     |       |          |       |          |        |          | 20.2   | 20.4     | 15.3  | 13.3     | 10.2  | 8.3      |
| range                                                            | 0-129 | 0-57     | 0-76   | 0-123    |       |          |       |          |        |          | 0-100  | 0-92     | 0-78  | 0-56     | 0-52  | 0-50     |
| unknown                                                          | 14    | 12       | 10     | 10       |       |          |       |          |        |          | 61     | 66       | 6     | 7        | 1     | 0        |
| Physical activity in<br>recent year:                             |       |          |        |          |       |          |       |          |        |          |        |          |       |          |       |          |
| mean (h/week):                                                   |       |          | 2.9    | 2.6      |       |          |       |          |        |          | 2.3    | 2.2      |       |          |       |          |
| range                                                            |       |          | 0-25   | 0-12     |       |          |       |          |        |          | 1-4    | 1-4      |       |          |       |          |
| unknown                                                          |       |          | 1      | 0        |       |          |       |          |        |          | 0      | 1        |       |          |       |          |

**Population-based studies (continued)**

| Variable                                        | MARIE   |          | MCCS    |          | NC_BCFR |          | OFBCR  |          | PBCS    |          | SASBAC  |          | US3SS   |          | USRT    |          |
|-------------------------------------------------|---------|----------|---------|----------|---------|----------|--------|----------|---------|----------|---------|----------|---------|----------|---------|----------|
|                                                 | cases   | controls | cases   | controls | cases   | controls | cases  | controls | cases   | controls | cases   | controls | cases   | controls | cases   | controls |
| Total numbers                                   | 2583    | 5309     | 703     | 766      | 268     | 154      | 1135   | 328      | 2009    | 2381     | 1246    | 1515     | 1444    | 1274     | 725     | 1053     |
| Reference age:                                  |         |          |         |          |         |          |        |          |         |          |         |          |         |          |         |          |
| mean                                            | 62.5    | 61.9     | 61.4    | 57.2     | 56.9    | 56.9     | 53.8   | 57.4     | 55.7    | 55.7     | 63.0    | 63.4     | 54.3    | 54.3     | 48.9    | 62.8     |
| range                                           | 50-75   | 49-75    | 37-80   | 38-70    | 26-65   | 51-65    | 22-81  | 40-69    | 27-75   | 24-75    | 50-75   | 49-76    | 29-69   | 27-75    | 22-82   | 42-94    |
| Age at Menarche:                                |         |          |         |          |         |          |        |          |         |          |         |          |         |          |         |          |
| mean                                            | 13.6    | 13.7     | 13.0    | 13.0     | 12.7    | 12.6     | 12.7   | 12.7     | 13.5    | 13.7     | 13.5    | 13.5     | 12.6    | 12.8     | 12.5    | 12.6     |
| range                                           | 9-20    | 8-20     | 9-20    | 9-21     | 9-18    | 8-16     | 8-18   | 9-21     | 9-21    | 8-20     | 9-18    | 8-21     | 7-18    | 8-22     | 8-18    | 8-35     |
| unknown                                         | 279     | 819      | 2       | 3        | 1       | 0        | 167    | 2        | 15      | 28       | 108     | 128      | 17      | 10       | 17      | 9        |
| Parous:                                         |         |          |         |          |         |          |        |          |         |          |         |          |         |          |         |          |
| no                                              | 432     | 783      | 131     | 105      | 51      | 24       | 318    | 39       | 289     | 260      | 177     | 148      | 195     | 165      | 161     | 202      |
| yes                                             | 2151    | 4526     | 572     | 661      | 217     | 130      | 817    | 289      | 1720    | 2121     | 1069    | 1367     | 1247    | 1106     | 563     | 849      |
| unknown                                         | 0       | 0        | 0       | 0        | 0       | 0        | 0      | 0        | 0       | 0        | 0       | 0        | 2       | 3        | 1       | 2        |
| Numbers of births:                              |         |          |         |          |         |          |        |          |         |          |         |          |         |          |         |          |
| mean                                            | 2.0     | 2.0      | 2.8     | 2.9      | 2.5     | 2.3      | 2.6    | 2.5      | 1.7     | 1.9      | 2.2     | 2.4      | 2.8     | 2.9      | 2.5     | 2.6      |
| range                                           | 1-7     | 1-9      | 1-11    | 1-11     | 1-7     | 1-5      | 1-8    | 1-6      | 1-10    | 1-7      | 1-8     | 1-13     | 1-10    | 1-11     | 1-6     | 1-12     |
| unknown                                         | 0       | 0        | 0       | 0        | 0       | 0        | 1      | 0        | 0       | 0        | 0       | 0        | 2       | 3        | 1       | 2        |
| Age at first birth                              |         |          |         |          |         |          |        |          |         |          |         |          |         |          |         |          |
| mean                                            | 24.4    | 24.3     | 25.5    | 25.2     | 24.0    | 24.0     | 25.0   | 24.0     | 24.5    | 23.7     | 25.5    | 24.7     | 24.1    | 23.8     | 25.8    | 25.1     |
| range                                           | 14-46   | 14-44    | 17-43   | 15-46    | 14-43   | 15-41    | 15-41  | 16-38    | 15-45   | 15-42    | 16-42   | 16-51    | 14-44   | 16-41    | 14-45   | 13-42    |
| unknown                                         | 2       | 1        | 2       | 0        | 0       | 0        | 8      | 0        | 0       | 0        | 2       | 0        | 4       | 4        | 1       | 3        |
| Ever breastfed:                                 |         |          |         |          |         |          |        |          |         |          |         |          |         |          |         |          |
| no                                              | 530     | 964      | 39      | 54       | 78      | 55       | 262    | 99       | 375     | 405      | 48      | 53       | 658     | 579      |         |          |
| yes                                             | 1621    | 3562     | 521     | 594      | 139     | 75       | 555    | 190      | 1345    | 1716     | 899     | 1049     | 587     | 523      |         |          |
| unknown                                         | 0       | 0        | 12      | 13       | 0       | 0        | 0      | 0        | 0       | 0        | 122     | 265      | 4       | 7        |         |          |
| Usual adult BMI,<br>age <54                     |         |          |         |          |         |          |        |          |         |          |         |          |         |          |         |          |
| mean                                            | 23.0    | 23.3     |         |          | 25.9    | 26.6     | 25.1   | 26.3     | 22.2    | 22.5     | 24.4    | 24.3     | 25.8    | 25.7     |         |          |
| range                                           | 17-43   | 16-52    |         |          | 17-47   | 18-45    | 14-68  | 7-45     | 16-36   | 16-38    | 17-39   | 18-31    | 17-57   | 17-57    |         |          |
| unknown                                         | 1       | 15       |         |          | 0       | 0        | 136    | 1        | 1       | 4        | 2       | 2        | 1       | 5        |         |          |
| Usual adult BMI,<br>age ≥54:                    |         |          |         |          |         |          |        |          |         |          |         |          |         |          |         |          |
| mean                                            | 23.3    | 23.3     |         |          | 26.2    | 28.5     | 26.3   | 26.5     | 23.5    | 23.6     | 25.7    | 25.5     | 27.1    | 26.7     |         |          |
| range                                           | 16-50   | 16-45    |         |          | 18-43   | 20-62    | 16-51  | 14-48    | 15-44   | 17-39    | 16-53   | 16-65    | 14-58   | 15-51    |         |          |
| unknown                                         | 40      | 96       |         |          | 2       | 1        | 74     | 1        | 14      | 19       | 53      | 74       | 8       | 6        |         |          |
| Adult height:                                   |         |          |         |          |         |          |        |          |         |          |         |          |         |          |         |          |
| mean (cm):                                      | 165     | 164      | 161     | 160      | 166     | 164      | 162    | 163      | 162     | 161      | 164     | 164      | 165     | 164      | 164     | 163      |
| range                                           | 139-187 | 143-186  | 142-181 | 140-188  | 150-183 | 150-180  | 99-186 | 150-196  | 136-185 | 130-189  | 147-190 | 128-183  | 145-200 | 142-191  | 130-183 | 132-198  |
| unknown                                         | 0       | 0        | 0       | 1        | 0       | 0        | 167    | 0        | 1       | 3        | 4       | 10       | 0       | 1        | 5       | 4        |
| Oral contraceptives                             |         |          |         |          |         |          |        |          |         |          |         |          |         |          |         |          |
| OC:                                             |         |          |         |          |         |          |        |          |         |          |         |          |         |          |         |          |
| never                                           | 958,    | 1888     | 310     | 353      | 81      | 31       |        |          | 1758    | 2108     | 847     | 999      | 627     | 553      |         |          |
| ever                                            | 1605    | 3373     | 391     | 413      | 187     | 123      |        |          | 231     | 250      | 395     | 511      | 815     | 720      |         |          |
| unknown                                         | 20      | 48       | 2       | 0        | 0       | 0        |        |          | 20      | 23       | 4       | 5        | 2       | 1        |         |          |
| Duration of OC use:                             |         |          |         |          |         |          |        |          |         |          |         |          |         |          |         |          |
| mean (years):                                   | 10.5    | 10.1     | 7.1     | 7.4      | 7.1     | 5.2      |        |          | 4.4     | 4.3      | 6.3     | 6.2      | 6.3     | 6.3      |         |          |
| range                                           | 1-35    | 1-36     | 1-40    | 1-29     | 1-30    | 1-20     |        |          | 1-34    | 1-23     | 1-25    | 1-25     | 1-30    | 1-35     |         |          |
| unknown                                         | 27      | 70       | 17      | 22       | 0       | 0        |        |          | 37      | 40       | 60      | 85       | 8       | 8        |         |          |
| Current use of<br>estrogen/<br>progestagen MHT: |         |          |         |          |         |          |        |          |         |          |         |          |         |          |         |          |
| no                                              | 1669    | 3832     |         |          |         |          |        |          | 945     | 1179     | 918     | 1215     | 548     | 550      |         |          |
| yes                                             | 691     | 921      |         |          |         |          |        |          | 104     | 61       | 209     | 173      | 218     | 130      |         |          |

**Population-based studies (continued)**

| Variable                                               | MARIE |          | MCCS  |          | NC BCFR |          | OFBCR |          | PBCS  |          | SASBAC |          | US3SS |          | USRT  |          |
|--------------------------------------------------------|-------|----------|-------|----------|---------|----------|-------|----------|-------|----------|--------|----------|-------|----------|-------|----------|
|                                                        | cases | controls | cases | controls | cases   | controls | cases | controls | cases | controls | cases  | controls | cases | controls | cases | controls |
| unknown                                                | 7     | 25       |       |          |         |          |       |          | 58    | 67       | 26     | 41       | 0     | 1        |       |          |
| Current use of estrogen only MHT:                      |       |          |       |          |         |          |       |          |       |          |        |          |       |          |       |          |
| no                                                     | 2088  | 4157     |       |          |         |          |       |          | 1044  | 1227     | 884    | 1185     | 607   | 540      |       |          |
| yes                                                    | 273   | 602      |       |          |         |          |       |          | 6     | 12       | 262    | 227      | 159   | 140      |       |          |
| unknown                                                | 6     | 19       |       |          |         |          |       |          | 57    | 68       | 7      | 17       | 0     | 1        |       |          |
| Duration of estrogen/progestagen MHT in current users: |       |          |       |          |         |          |       |          |       |          |        |          |       |          |       |          |
| mean (years):                                          | 10.6  | 10.5     |       |          |         |          |       |          | 6.3   | 6.6      | 7.3    | 6.0      | 8.2   | 6.0      |       |          |
| range                                                  | 1-34  | 1-37     |       |          |         |          |       |          | 1-20  | 1-26     | 1-19   | 1-20     | 1-27  | 1-25     |       |          |
| unknown                                                | 14    | 38       |       |          |         |          |       |          | 60    | 67       | 26     | 41       | 0     | 1        |       |          |
| Duration of estrogen only MHT in current users:        |       |          |       |          |         |          |       |          |       |          |        |          |       |          |       |          |
| mean (years):                                          | 10.4  | 9.8      |       |          |         |          |       |          | 3.5   | 2.7      | 8.5    | 7.6      | 13.2  | 13.9     |       |          |
| range                                                  | 1-29  | 1-33     |       |          |         |          |       |          | 1-10  | 1-6      | 1-29   | 1-32     | 1-37  | 1-40     |       |          |
| unknown                                                | 7     | 25       |       |          |         |          |       |          | 60    | 69       | 8      | 20       | 26    | 30       |       |          |
| Mean lifetime intake of alcohol <sup>1</sup> :         |       |          |       |          |         |          |       |          |       |          |        |          |       |          |       |          |
| mean (g/day):                                          | 10.1  | 9.6      | 13.2  | 11.8     |         |          |       |          | 5.8   | 6.2      |        |          |       |          |       |          |
| range                                                  | 0-430 | 0-195    | 0-130 | 0-78     |         |          |       |          | 0-197 | 0-233    |        |          |       |          |       |          |
| unknown                                                | 10    | 22       | 1     | 0        |         |          |       |          | 45    | 56       |        |          |       |          |       |          |
| Smoking:                                               |       |          |       |          |         |          |       |          |       |          |        |          |       |          |       |          |
| never                                                  | 1401  | 2793     | 488   | 509      |         |          | 466   | 162      | 855   | 1102     | 707    | 867      | 667   | 605      |       |          |
| ever                                                   | 1182  | 2514     | 215   | 257      |         |          | 509   | 166      | 1152  | 1278     | 539    | 648      | 776   | 669      |       |          |
| unknown                                                | 0     | 2        | 0     | 0        |         |          | 160   | 0        | 2     | 1        | 0      | 0        | 1     | 0        |       |          |
| Pack-years of smoking:                                 |       |          |       |          |         |          |       |          |       |          |        |          |       |          |       |          |
| mean                                                   | 14.9  | 14.3     | 21.4  | 19.9     |         |          | 21.0  | 20.9     | 10.3  | 11.1     |        |          | 20.8  | 20.9     |       |          |
| range                                                  | 0-104 | 0-101    | 0-135 | 0-112    |         |          | 0-154 | 0-66     | 0-84  | 0-90     |        |          | 0-180 | 0-140    |       |          |
| unknown                                                | 5     | 23       | 1     | 1        |         |          | 209   | 0        | 21    | 13       |        |          | 2     | 2        |       |          |
| Physical activity in recent year:                      |       |          |       |          |         |          |       |          |       |          |        |          |       |          |       |          |
| mean (h/week):                                         | 9.4   | 9.7      |       |          |         |          |       |          |       |          | 2.7    | 2.7      | 3.8   | 3.8      |       |          |
| range                                                  | 0-55  | 0-62     |       |          |         |          |       |          |       |          | 1-4    | 1-4      | 0-41  | 0-41     |       |          |
| unknown                                                | 35    | 63       |       |          |         |          |       |          |       |          | 8      | 54       | 0     | 0        |       |          |

### Studies of mixed design or hospital-based studies

|                     | BBCC    |          | BBCS    |          | kConFab/AOCS |          | LMBC    |          | MCBCS   |          | MSKCC |          | SBCS    |          | SEARCH |          |
|---------------------|---------|----------|---------|----------|--------------|----------|---------|----------|---------|----------|-------|----------|---------|----------|--------|----------|
| variable            | cases   | controls | cases   | controls | cases        | controls | cases   | controls | cases   | controls | cases | controls | cases   | controls | cases  | controls |
| Reference age: n    | 1432    | 1002     | 1381    | 1297     | 499          | 962      | 2779    | 1621     | 1803    | 2452     | 425   | 455      | 1111    | 1283     | 6719   | 6503     |
| mean                | 55.4    | 57.2     | 53.9    | 51.4     | 45.0         | 58.3     | 56.6    | 44.1     | 56.8    | 56.6     | 47.1  | 47.0     | 59.0    | 57.7     | 53.3   | 58.4     |
| range               | 22-96   | 18-100   | 25-77   | 21-81    | 20-76        | 20-83    | 21-94   | 19-66    | 22-93   | 19-91    | 23-85 | 24-86    | 28-92   | 45-80    | 23-88  | 26-81    |
| Age at Menarche:    |         |          |         |          |              |          |         |          |         |          |       |          |         |          |        |          |
| mean                | 13.6    | 13.4     | 12.8    | 12.8     |              |          |         |          | 12.7    | 12.8     | 12.5  | 12.7     | 13.1    | 13.0     | 12.8   | 13.0     |
| range               | 9-21    | 9-22     | 8-20    | 8-18     |              |          |         |          | 9-19    | 9-18     | 8-21  | 9-19     | 9-20    | 9-18     | 8-19   | 8-21     |
| n unknown           | 85      | 106      | 19      | 344      |              |          |         |          | 204     | 309      | 7     | 3        | 17      | 14       | 369    | 1762     |
| Parous:             |         |          |         |          |              |          |         |          |         |          |       |          |         |          |        |          |
| no                  | 181     | 152      | 209     | 240      | 57           | 100      | 330     | 125      | 221     | 456      | 12    | 24       | 172     | 132      | 861    | 706      |
| yes                 | 1177    | 772      | 1155    | 1023     | 442          | 862      | 2010    | 1130     | 1520    | 1851     | 365   | 390      | 939     | 1151     | 5765   | 4293     |
| unknown             | 74      | 78       | 17      | 34       | 0            | 0        | 439     | 366      | 62      | 145      | 48    | 41       | 0       | 0        | 93     | 1504     |
| Numbers of births:  |         |          |         |          |              |          |         |          |         |          |       |          |         |          |        |          |
| mean                | 2.0     | 2.4      | 2.3     | 2.3      |              |          | 2.2     | 2.0      | 2.8     | 2.8      |       |          | 2.3     | 2.3      | 2.3    | 2.4      |
| range               | 1-9     | 1-8      | 1-13    | 1-12     |              |          | 1-12    | 1-8      | 1-13    | 1-14     |       |          | 1-8     | 1-8      | 1-11   | 1-10     |
| unknown             | 77      | 78       | 17      | 34       |              |          | 468     | 368      | 62      | 145      |       |          | 0       | 0        | 93     | 1506     |
| Age at first birth: |         |          |         |          |              |          |         |          |         |          |       |          |         |          |        |          |
| mean                | 25.5    | 24.5     | 25.0    | 25.7     |              |          |         |          | 24.3    | 23.9     | 28.1  | 29.3     | 24.6    | 23.6     | 24.1   | 25.3     |
| range               | 16-44   | 15-41    | 15-42   | 15-47    |              |          |         |          | 14-51   | 15-42    | 16-43 | 16-44    | 15-41   | 13-43    | 11-45  | 16-46    |
| unknown             | 101     | 117      | 17      | 59       |              |          |         |          | 79      | 158      | 121   | 92       | 24      | 5        | 257    | 1522     |
| Ever breastfed:     |         |          |         |          |              |          |         |          |         |          |       |          |         |          |        |          |
| no                  |         |          |         |          | 72           | 23       |         |          |         |          |       |          |         |          |        |          |
| yes                 |         |          |         |          | 368          | 730      |         |          |         |          |       |          |         |          |        |          |
| unknown             |         |          |         |          | 2            | 109      |         |          |         |          |       |          |         |          |        |          |
| Usual adult BMI,    |         |          |         |          |              |          |         |          |         |          |       |          |         |          |        |          |
| age <54:            |         |          |         |          |              |          |         |          |         |          |       |          |         |          |        |          |
| mean                |         |          |         |          | 26.1         | 26.6     |         |          |         |          |       |          |         |          |        |          |
| range               |         |          |         |          | 17-46        | 18-53    |         |          |         |          |       |          |         |          |        |          |
| unknown             |         |          |         |          | 87           | 8        |         |          |         |          |       |          |         |          |        |          |
| Usual adult BMI,    |         |          |         |          |              |          |         |          |         |          |       |          |         |          |        |          |
| age >=54:           |         |          |         |          |              |          |         |          |         |          |       |          |         |          |        |          |
| mean                |         |          |         |          | 25.7         | 26.9     |         |          |         |          |       |          |         |          |        |          |
| range               |         |          |         |          | 16-47        | 16-65    |         |          |         |          |       |          |         |          |        |          |
| unknown             |         |          |         |          | 17           | 22       |         |          |         |          |       |          |         |          |        |          |
| Adult height:       |         |          |         |          |              |          |         |          |         |          |       |          |         |          |        |          |
| mean (cm):          | 164     | 164      | 163     | 163      | 164          | 163      | 163     | 164      | 165     | 164      |       |          | 162     | 162      |        |          |
| range               | 140-188 | 146-181  | 142-191 | 142-201  | 120-189      | 124-183  | 135-198 | 146-186  | 130-212 | 122-201  |       |          | 142-183 | 137-183  |        |          |
| unknown             | 87      | 123      | 13      | 42       | 3            | 7        | 646     | 438      | 156     | 169      |       |          | 19      | 1        |        |          |
| Oral contraceptives |         |          |         |          |              |          |         |          |         |          |       |          |         |          |        |          |
| OC:                 |         |          |         |          |              |          |         |          |         |          |       |          |         |          |        |          |
| never               |         |          | 540     | 574      | 75           | 197      |         |          | 548     | 475      |       |          | 654     | 500      |        |          |
| ever                |         |          | 835     | 661      | 423          | 765      |         |          | 1085    | 1454     |       |          | 438     | 780      |        |          |
| unknown             |         |          | 6       | 62       | 1            | 0        |         |          | 170     | 523      |       |          | 19      | 3        |        |          |
| Duration of OC use: |         |          |         |          |              |          |         |          |         |          |       |          |         |          |        |          |
| mean (years):       |         |          | 7.0     | 8.4      | 8.3          | 9.4      |         |          | 7.4     | 7.1      |       |          | 6.9     | 6.6      |        |          |
| range               |         |          | 1-33    | 1-30     | 1-30         | 1-36     |         |          | 1-30    | 1-35     |       |          | 1-29    | 1-40     |        |          |
| unknown             |         |          | 49      | 153      | 11           | 4        |         |          | 204     | 566      |       |          | 28      | 9        |        |          |
| Current use of      |         |          |         |          |              |          |         |          |         |          |       |          |         |          |        |          |
| estrogen/           |         |          |         |          |              |          |         |          |         |          |       |          |         |          |        |          |
| progestagen MHT:    |         |          |         |          |              |          |         |          |         |          |       |          |         |          |        |          |
| no                  |         |          |         |          |              |          |         |          |         |          |       |          |         |          |        |          |

# Studies of mixed design or hospital-based studies

| variable                         | BBCC  |          | BBCS  |          | kConFab/AOCS |          | LMBC  |          | MCBCS |          | MSKCC |          | SBCS  |          | SEARCH |          |
|----------------------------------|-------|----------|-------|----------|--------------|----------|-------|----------|-------|----------|-------|----------|-------|----------|--------|----------|
|                                  | cases | controls | cases | controls | cases        | controls | cases | controls | cases | controls | cases | controls | cases | controls | cases  | controls |
| yes                              |       |          |       |          |              |          |       |          |       |          |       |          |       |          |        |          |
| unknown                          |       |          |       |          |              |          |       |          |       |          |       |          |       |          |        |          |
| Current use of                   |       |          |       |          |              |          |       |          |       |          |       |          |       |          |        |          |
| estrogen only MHT:               |       |          |       |          |              |          |       |          |       |          |       |          |       |          |        |          |
| no                               |       |          |       |          |              |          |       |          |       |          |       |          |       |          |        |          |
| yes                              |       |          |       |          |              |          |       |          |       |          |       |          |       |          |        |          |
| unknown                          |       |          |       |          |              |          |       |          |       |          |       |          |       |          |        |          |
| Duration of                      |       |          |       |          |              |          |       |          |       |          |       |          |       |          |        |          |
| estrogen/                        |       |          |       |          |              |          |       |          |       |          |       |          |       |          |        |          |
| progestagen MHT                  |       |          |       |          |              |          |       |          |       |          |       |          |       |          |        |          |
| in current users:                |       |          |       |          |              |          |       |          |       |          |       |          |       |          |        |          |
| mean (years):                    |       |          |       |          |              |          |       |          |       |          |       |          |       |          |        |          |
| range                            |       |          |       |          |              |          |       |          |       |          |       |          |       |          |        |          |
| unknown                          |       |          |       |          |              |          |       |          |       |          |       |          |       |          |        |          |
| Duration of                      |       |          |       |          |              |          |       |          |       |          |       |          |       |          |        |          |
| estrogen only MHT                |       |          |       |          |              |          |       |          |       |          |       |          |       |          |        |          |
| in current users:                |       |          |       |          |              |          |       |          |       |          |       |          |       |          |        |          |
| mean (years):                    |       |          |       |          |              |          |       |          |       |          |       |          |       |          |        |          |
| range                            |       |          |       |          |              |          |       |          |       |          |       |          |       |          |        |          |
| unknown                          |       |          |       |          |              |          |       |          |       |          |       |          |       |          |        |          |
| Mean lifetime                    |       |          |       |          |              |          |       |          |       |          |       |          |       |          |        |          |
| intake of alcohol <sup>1</sup> : |       |          |       |          |              |          |       |          |       |          |       |          |       |          |        |          |
| mean (g/day):                    |       |          |       |          |              |          |       |          |       |          |       |          |       |          |        |          |
| range                            |       |          |       |          |              |          |       |          |       |          |       |          |       |          |        |          |
| unknown                          |       |          |       |          |              |          |       |          |       |          |       |          |       |          |        |          |
| Smoking:                         |       |          |       |          |              |          |       |          |       |          |       |          |       |          |        |          |
| never                            | 1024  | 512      | 629   | 647      | 293          | 562      |       |          | 994   | 1245     |       |          |       |          |        |          |
| ever                             | 332   | 360      | 724   | 611      | 202          | 397      |       |          | 673   | 698      |       |          |       |          |        |          |
| unknown                          | 76    | 130      | 28    | 39       | 4            | 3        |       |          | 136   | 509      |       |          |       |          |        |          |
| Pack-years of                    |       |          |       |          |              |          |       |          |       |          |       |          |       |          |        |          |
| smoking:                         |       |          |       |          |              | 4        |       |          |       |          |       |          |       |          |        |          |
| mean                             | 15.4  | 12.5     | 17.7  | 13.3     | 15.7         | 14.3     |       |          | 17.7  | 15.5     |       |          |       |          |        |          |
| range                            | 0-80  | 0-80     | 0-92  | 0-100    | 0-179        | 0-72     |       |          | 0-117 | 0-114    |       |          |       |          |        |          |
| unknown                          | 272   | 207      | 66    | 88       | 11           | 4        |       |          | 473   | 642      |       |          |       |          |        |          |
| Physical activity in             |       |          |       |          |              |          |       |          |       |          |       |          |       |          |        |          |
| recent year:                     |       |          |       |          |              |          |       |          |       |          |       |          |       |          |        |          |
| mean (h/week):                   |       |          |       |          |              |          |       |          |       |          |       |          |       |          |        |          |
| range                            |       |          |       |          |              |          |       |          |       |          |       |          |       |          |        |          |
| unknown                          |       |          |       |          |              |          |       |          |       |          |       |          |       |          |        |          |

<sup>1</sup> Mean lifetime alcohol intake derived from duration and amount of alcohol intake in g/day at different age periods
