# Supplementary material for: Evidence of Gene–Environment Interactions between Common Breast Cancer Susceptibility Loci and Established Environmental Risk Factors
Source: PLoS Genet. 2013 Mar 27;9(3):e1003284. doi: 10.1371/journal.pgen.1003284 (PMC3609648; doi:10.1371/journal.pgen.1003284)
Supplement: Table S7 — Gene-environment interactions between SNPs and breast cancer risk factors in Caucasians with interaction p-value<10−4, overall and by ER status, adjusted for additional covariates. (PDF) [file pgen.1003284.s007.pdf]

**Table S7. Gene-environment interactions between SNPs and breast cancer risk factors in Caucasians with interaction p-value <10<sup>-3</sup>, overall and by ER status, adjusted for additional covariates**

| Variable                                                      | SNP                     | Locus  | All                |                         |                      | Estrogen receptor-positive |                         |                      | Estrogen receptor-negative |                         |                      |
|---------------------------------------------------------------|-------------------------|--------|--------------------|-------------------------|----------------------|----------------------------|-------------------------|----------------------|----------------------------|-------------------------|----------------------|
|                                                               |                         |        | N (cases/controls) | OR (95%CI) <sup>1</sup> | P-value <sup>2</sup> | N (cases)                  | OR (95%CI) <sup>1</sup> | P-value <sup>2</sup> | N (cases)                  | OR (95%CI) <sup>1</sup> | P-value <sup>2</sup> |
| Number of births (among parous)                               | rs3817198               | LSP1   | 4392/6018          | 1.07 (1.01-1.14)        | 0.017                | 2935                       | 1.10 (1.03-1.17)        | 0.006                | 1137                       | 1.03 (0.93-1.03)        | 0.609                |
| Parous (yes/no)                                               | rs11249433              | 1p11.2 | 5413/5603          | 1.20 (1.03-1.40)        | 0.020                | 3590                       | 1.28 (1.08-1.52)        | 0.005                | 1350                       | 1.13 (0.88-1.45)        | 0.328                |
| Mean lifetime intake of alcohol <sup>3</sup> (<20/ >=20g/day) | rs17468277 <sup>4</sup> | CASP8  | 5188/ 8145         | 1.59 (1.21-2.09)        | 0.001                | 3738                       | 1.55 (1.16-2.08)        | 0.003                | 1225                       | 1.46 (0.86-2.47)        | 0.164                |

<sup>1</sup> Odds ratio (95% confidence interval) for GxE interaction from case-control analysis stratified by study, adjusted for reference age and additionally (if not variable of interest) for being parous (yes/no), number of births, BMI, age surrogate for postmenopausal status (≥54 years), interaction of BMI and postmenopausal status (≥54 years), current use of menopausal hormone therapy (MHT), past use of MHT, duration of oral contraceptives use, lifetime alcohol intake, smoking (pack-years). Subjects with missing covariable information were excluded.

<sup>2</sup> p-value for GxE interaction from case-control analysis stratified by study and adjusted for reference age

<sup>3</sup> Mean lifetime daily alcohol intake derived from duration and amount of alcohol intake in g/day at different age periods

<sup>4</sup> or the highly correlated SNP rs1045485 ( $r^2=1$  in HapMap CEU)
